# Supplementary material
Source: Royal Society of Chemistry journal article supplement (https://www.rsc.org/suppdata/cc/1999/2287/907681f.doc)
Supplement: Supplementary file 1 [file 907681f.doc]

Syntheses of[4,4’-H2bipy][MCl4] {M = Zn (**1**), Mn (**2**), Cd (**3**)}. Synthesis of **1**: addition of a solution of [4,4'-H2bipy]Cl2 (238mg, 1.5mmol) in H2O (10cm3) to a solution of ZnCl2 (220mg, 1.5mmol) and [Bu4N]Cl (800mg. 3.0mmol) in H2O (10cm3). The solution was heated to reduce the volume, followed by slow cooling with simultaneous slow evaporation. Colourless crystals were grown from diffusion of Et2O into the solution. Yield 270mg (59%). Gave satisfactory microanalytical data (Found: C 32.98, H 2.60, N 7.65; Calculated: C 32.87, H 2.74, N 7.67). Synthesis of **2**: addition of a colourless solution of [4,4'-H2bipy]Cl2 (304mg, 1.92mmol) in H2O (10cm3) to a colourless solution of MnCl2.H2O (380mg, 1.92mmol) and [Bu4N]Cl (1.06g, 3.84mmol) in H2O (10cm3) and C2H5OH (5cm3) caused the formation of a white precipitate. 10cm3 of H2O were added and the precipitate dissolved. The solution was heated to reduce the volume. Orange crystals were grown from slow cooling with simultaneous slow evaporation. Yield 210mg (58%). Gave satisfactory microanalytical data (Found: C 33.97: H 2.62: N 7.39; Calculated: C 33.8, H 2.8; N 7.89). Synthesis of **3**: addition of a colourless solution of [4,4'-H2bipy]Cl2 (320mg, 2.02mmol) in H2O (10cm3) to a colourless solution of CdCl2 (367mg, 2.00mmol) and [Bu4N]Cl (1.115g, 4.012mmol) in H2O (10cm3) and C2H5OH (5cm3) caused the formation of a pale yellow precipitate. 20cm3 of H2O were added and the precipitate dissolved. The pale yellow solution was heated to reduce the volume. Off-white crystals were grown from slow cooling with simultaneous slow evaporation. Yield 561mg (68%). Gave satisfactory microanalytical data (Found: C 29.35; H 2.61; N 6.50; Calculated: C 29.12; H 2.44; N 6.79).
